# Supplementary material for: Paradoxical pharmacological dissociations result from drugs that enhance delta oscillations but preserve consciousness
Source: PubMed Central journal article supplement (PMC10282051; doi:10.1038/s42003-023-04988-8), 2023-06-20
Supplement: 42003_2023_4988_MOESM1_ESM.pdf [file 42003_2023_4988_MOESM1_ESM.pdf]

## Description of Additional Supplementary Files

**File name:** Supplementary Data 1

**Description:** Source data for Figure 1b
